# Supplementary material for: Predicting breast cancer response to neoadjuvant treatment using multi-feature MRI: results from the I-SPY 2 TRIAL
Source: PubMed Central journal article supplement (PMC7695723; doi:10.1038/s41523-020-00203-7), 2020-11-27
Supplement: 41523_2020_203_MOESM1_ESM.pdf [file 41523_2020_203_MOESM1_ESM.pdf]

# Supplemental

**Supplementary Table 1.** Variables included in optimized models

| Model type                                                          | Included variables                                                                                      |
|---------------------------------------------------------------------|---------------------------------------------------------------------------------------------------------|
| <b>All subtypes (N=384, pCR rate = 114/384, 29.7%)</b>              |                                                                                                         |
| FTV only                                                            | Subtype, % $\Delta$ FTV0_1, % $\Delta$ FTV0_2                                                           |
| SPH only                                                            | Subtype, SPH0                                                                                           |
| BPE only                                                            | Subtype, BPE0, % $\Delta$ BPE0_1, % $\Delta$ BPE0_3                                                     |
| LD only                                                             | Subtype, LD0, % $\Delta$ LD0_2, % $\Delta$ LD0_3                                                        |
| Combined                                                            | Subtype, % $\Delta$ FTV0_2, % $\Delta$ SPH0_2, BPE0, % $\Delta$ LD0_2, % $\Delta$ LD0_3                 |
| <b>HR+/HER2- (N=162, pCR rate = 24/162, 14.8%)</b>                  |                                                                                                         |
| FTV only                                                            | % $\Delta$ FTV0_1, % $\Delta$ FTV0_2, % $\Delta$ FTV0_3                                                 |
| SPH only                                                            | % $\Delta$ SPH0_1, % $\Delta$ SPH0_2                                                                    |
| BPE only                                                            | BPE0, % $\Delta$ BPE0_1, % $\Delta$ BPE0_3                                                              |
| LD only                                                             | % $\Delta$ LD0_2, % $\Delta$ LD0_3                                                                      |
| Combined                                                            | % $\Delta$ FTV0_1, % $\Delta$ FTV0_3, % $\Delta$ SPH0_1, BPE0, % $\Delta$ BPE0_2, LD0, % $\Delta$ LD0_2 |
| <b>HR+/HER2+ (N=60, pCR rate = 19/60, 31.7%)</b>                    |                                                                                                         |
| FTV only                                                            | % $\Delta$ FTV0_1, % $\Delta$ FTV0_3                                                                    |
| SPH only                                                            | % $\Delta$ SPH0_1                                                                                       |
| BPE only                                                            | % $\Delta$ BPE0_3                                                                                       |
| LD only                                                             | % $\Delta$ LD0_1, % $\Delta$ LD0_3                                                                      |
| Combined                                                            | % $\Delta$ SPH0_2, % $\Delta$ BPE0_3, % $\Delta$ LD0_3                                                  |
| <b>HR-/HER2+ (N=30, pCR rate = 20/30, 66.7%)</b>                    |                                                                                                         |
| FTV only                                                            | % $\Delta$ FTV0_3                                                                                       |
| SPH only                                                            | SPH0, % $\Delta$ SPH0_1                                                                                 |
| BPE only                                                            | BPE0, % $\Delta$ BPE0_1, % $\Delta$ BPE0_2                                                              |
| LD only                                                             | LD0, % $\Delta$ LD0_2                                                                                   |
| Combined                                                            | % $\Delta$ FTV0_3, SPH0, % $\Delta$ SPH0_1, % $\Delta$ BPE0_1                                           |
| <b>HR-/HER2- (triple negative, N=132, pCR rate = 51/132, 38.6%)</b> |                                                                                                         |
| FTV only                                                            | % $\Delta$ FTV0_1, % $\Delta$ FTV0_2                                                                    |
| SPH only                                                            | % $\Delta$ SPH0_1                                                                                       |
| BPE only                                                            | <b>BPE0</b> , % $\Delta$ BPE0_2                                                                         |
| LD only                                                             | % $\Delta$ LD0_2                                                                                        |
| Combined                                                            | % $\Delta$ FTV0_2, % $\Delta$ SPH0_2, <b>BPE0</b> , % $\Delta$ BPE0_2, % $\Delta$ LD0_2                 |

\*bolded AUCs were the highest AUC in each cohort. Bolded variables were with  $p < 0.05$ .

**Supplementary Table 2.** Standardized I-SPY 2 DCE-MRI acquisition parameters

| <b>Parameter</b>                             | <b>Value</b>                      |
|----------------------------------------------|-----------------------------------|
| Sequence type                                | Gradient echo (GE)                |
| 2D or 3D sequence                            | 3D                                |
| Slice orientation                            | Axial                             |
| Laterality                                   | Bilateral                         |
| Frequency direction                          | A/P                               |
| Phase direction                              | R/L                               |
| FOV - frequency                              | 260 – 360 mm                      |
| FOV - phase                                  | 260 – 360 mm                      |
| Matrix – frequency (acquired)                | 384 – 512                         |
| In-plane resolution                          | ≤ 1.4 mm                          |
| Fat-suppression                              | Active fat-sat recommended        |
| TR                                           | 4 – 10 ms                         |
| TE                                           | Minimum TE                        |
| Flit angle                                   | 10 – 20 degrees                   |
| B values                                     | N/A                               |
| Slice thickness (acquired, not interpolated) | ≤ 2.5 mm                          |
| Number of slices                             | ≥ 60; complete bilateral coverage |
| Slice Gap                                    | No gap                            |
| Parallel imaging factor                      | ≤ 2                               |
| No. of excitations or averages               | ≤ 2                               |
| k-space ordering                             | -k to +k (standard, non-centric)  |
| Sequence acquisition time                    | 80 sec ≤ scan time ≤ 100 sec      |
| Total post-contrast imaging duration         | ≥ 8 minutes following injection   |

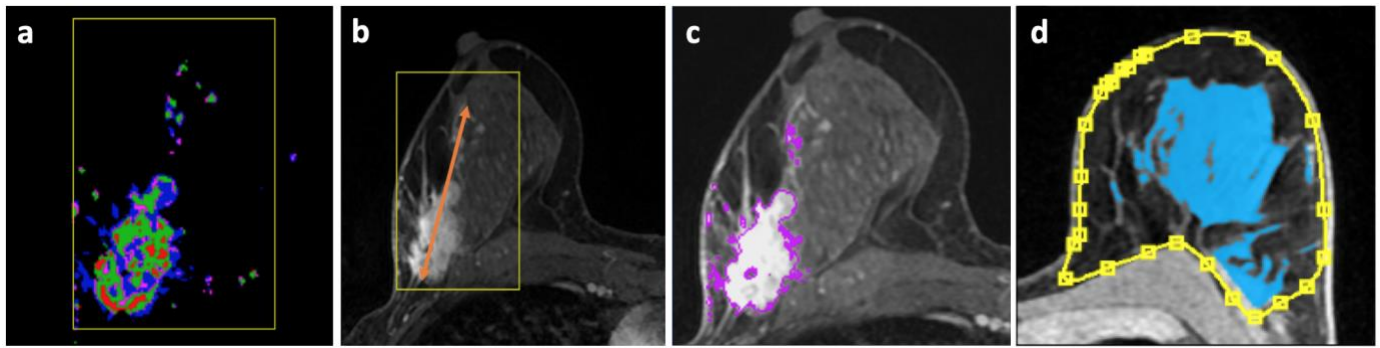

**Supplementary Figure 1.** Illustration of MRI feature measurements. A. functional tumor volume (FTV). Voxels with percentage enhancement (PE)  $\geq 70\%$  within the volume-of-interest shown as the yellow rectangular frame are counted in the FTV calculation. Color represents different levels of signal enhancement ratio (red: SER  $> 1.1$ ; green:  $0.9 \leq \text{SER} \leq 1.1$ ; blue: SER  $< 0.9$ ). B. longest diameter (LD). C. sphericity (SPH). Voxels in color mark where tumor boundary is. D. background parenchymal enhancement (BPE). Yellow curve shows the whole breast segmentation and voxels in blue shows the segmented fibroglandular tissue within the breast. BPE is calculated as the average PE among all blue voxels.
